# Supplementary material for: The BRCT Domain of PARP-1 Is Required for Immunoglobulin Gene Conversion
Source: PLoS Biol. 2010 Jul 20;8(7):e1000428. doi: 10.1371/journal.pbio.1000428 (PMC2907289; doi:10.1371/journal.pbio.1000428)
Supplement: Figure S4 — Background mutation rates of polymerase and DT40s in culture. (A) Mutations accumulated in an irrelevant gene in DT40 cells over 8 wk (120 generations) in culture when amplified with Pfx (Invitrogen). (B) Mutations accumulated in the constant region of IgL in DT40 cells over 6 wk (84 generations) in culture when amplified with Pfx (Invitrogen). (C) Comparison of mutations accumulated in the variable region of IgL in AID−/− PARPWT DT40 cells over 10 wk (140 generations) in culture when amplified with Pfx (Invitrogen) or Pfu (Stratagene). (D) Comparison of mutations accumulated in the variable region of IgL in Ugi expressing PARP-1−/− DT40 cells over 3 wk (46 generations) in culture when amplified with Pfx (Invitrogen) or Pfu (Stratagene). (0.02 MB PDF) [file pbio.1000428.s004.pdf]

**A Irrelevant Gene**

|        |  |    |   |   |   |  |
|--------|--|----|---|---|---|--|
| Pfx    |  | to |   |   |   |  |
|        |  | a  | t | g | c |  |
| from a |  |    | 0 | 0 | 0 |  |
| t      |  | 0  |   | 0 | 1 |  |
| g      |  | 0  | 0 |   | 1 |  |
| c      |  | 0  | 2 | 0 |   |  |

**2.50E-07 Mut/bp/generation**  
 25.0% Transversions at GC  
 50.0% Transitions at GC  
 25.0% Mutations at AT  
 4 Total mutations  
 4 133200 Bp sequenced

**B Constant Region**

|        |  |    |   |   |   |  |
|--------|--|----|---|---|---|--|
| Pfx    |  | to |   |   |   |  |
|        |  | A  | T | G | C |  |
| from A |  |    | 2 | 0 | 1 |  |
| T      |  | 0  |   | 0 | 2 |  |
| G      |  | 1  | 0 |   | 2 |  |
| C      |  | 0  | 4 | 0 |   |  |

**7.88E-07 Mut/bp/generation**  
 16.7% Transversions at GC  
 41.7% Transitions at GC  
 41.7% Mutations at AT  
 12 Total mutations  
 181,200 Bp sequenced

**C AID-/- IgL-V**

|        |  |    |   |   |   |  |
|--------|--|----|---|---|---|--|
| Pfx    |  | to |   |   |   |  |
|        |  | A  | T | G | C |  |
| from A |  |    | 1 | 1 | 0 |  |
| T      |  | 0  |   | 0 | 2 |  |
| G      |  | 3  | 0 |   | 1 |  |
| C      |  | 3  | 1 | 0 |   |  |

**8.17E-07 Mut/bp/generation**  
 33.3% Transversions at GC  
 33.3% Transitions at GC  
 33.3% Mutations at AT  
 12 Total mutations  
 102,000 Bp sequenced

  

**AID-/- IgL-V**

|        |  |    |   |   |   |  |
|--------|--|----|---|---|---|--|
| Pfu    |  | to |   |   |   |  |
|        |  | A  | T | G | C |  |
| from A |  |    | 0 | 0 | 0 |  |
| T      |  | 0  |   | 0 | 0 |  |
| G      |  | 3  | 0 |   | 0 |  |
| C      |  | 2  | 3 | 0 |   |  |

**6.14E-07 Mut/bp/generation**  
 25.0% Transversions at GC  
 75.0% Transitions at GC  
 0.0% Mutations at AT  
 8 Total mutations  
 93,000 Bp sequenced

**D PARP-1-/- Ugi**

|        |  |    |   |   |   |  |
|--------|--|----|---|---|---|--|
| Pfx    |  | to |   |   |   |  |
|        |  | a  | t | g | c |  |
| from a |  |    | 0 | 2 | 0 |  |
| t      |  | 0  |   | 0 | 0 |  |
| g      |  | 4  | 0 |   | 0 |  |
| c      |  | 1  | 0 | 0 |   |  |

**4.91E-06 Mut/bp/generation**  
 14.3% Transversions at GC  
 57.1% Transitions at GC  
 28.6% Mutations at AT  
 7 Total mutations  
 31000 Bp sequenced

  

**PARP-1-/- Ugi**

|        |  |    |   |   |   |  |
|--------|--|----|---|---|---|--|
| Pfu    |  | to |   |   |   |  |
|        |  | a  | t | g | c |  |
| from a |  |    | 1 | 0 | 0 |  |
| t      |  | 1  |   | 0 | 1 |  |
| g      |  | 5  | 0 |   | 0 |  |
| c      |  | 1  | 1 | 0 |   |  |

**4.14E-06 Mut/bp/generation**  
 10.0% Transversions at GC  
 60.0% Transitions at GC  
 30.0% Mutations at AT  
 10 Total mutations  
 52500 Bp sequenced
