# Supplementary material for: The BRCT Domain of PARP-1 Is Required for Immunoglobulin Gene Conversion
Source: PubMed Central journal article supplement (PMC2907289; doi:10.1371/journal.pbio.1000428), 2010-07-20
Supplement: pbio.1000428.s001.pdf [file pbio.1000428.s001.pdf]

WT 261 reads 35 day culture period

G C C G C C A A G T C C A A G A A A A A C C C C C A C T A T C A C C A A A A A T C G A C A A A A T G T C A C A A T T T C A C G

T T

A A A A A A A

A T G G G G G A A G A A A G A C C G A G A C G A G G T C A G C G A C T C A C C T A G G A C G G T C A G G G T T G T C C C G G C

T T

G

C C C A A A T G C A G C A C C A C T G T T G T C T G C A C T C C C A C A G A A A T A G A C A G C C T C G T C A T C G G C T C G

T

C C T T C G T A G

T G

A

G A C C C C A G T G A T G G T T A A T G T G T T T G T G G A G C C G G A T A G G G A A C C G G A G A A T C G T G A A G G G A T

C

A

A

C C C G T G G A G C C G G A T G T G G A A C C G G A G A A T C G T G A A G G G A T

G C

A

G C

G C

G C

C C A

G C

A G A T G T G G A A C C G G A G A A T C G T G A A G G G A T

G T C C G A G G G T C T C T T G T C G T T G T C A T A G A T C A C A G T G A C A G G G C A C T G C C A G G A G A C T T C T G

G C C C G A G G G T C T C T C A T C A T C C C A G T A G A T C A C A G T G A C A A G G G C T C T G C C A G G A G A C T T C T G

C

G T T G G T

G C A C

A

T G C

T

G T T G G T G T T G T C A T A G A T C A G A G T G A C A G G G G C A C T G C C A G G T G C C T T C T G

T T G A G G G T C T C T T G T C A T T C C A G

T

A

G

A

G T C C G A G G G T C T C T T G T C G T T G T C A T A G A T C A C A G T G A C A A

A

C T G G T G C C A G C C A T A A T A G T A A C T T C C A G C A T A G C T G C C A C C C C G G A G C A G G T G A T C T T G A C

T

A

C T

T

G

A

C T G G A A C C A G C C A T A G C T A T A G C T G C C C C C A G

C

C

C

A

A T A A C T T C C A G G

C

C T G G T A C C A G C C A T A G T A G C T C C T A T C C C C G G A G C A G G T G A T C T T G A C G G T T T C T C C C G G G T T

A A

T A G

A A

C G

T C A C T

T A C C A G C C A T A A T A G T A A C T T C C A G C C G T

A

A

G G T T T C T C C T G G G T T C G C T G A C A C C G A G G C C G G C T G A G T C A G C G C T G C C T G C A C C A G G G A A C C

T A A T

A

T

G

T G C T G A C A C C G A G G A

T G G A G A G G G A G A G G A G A G G G G A G A A A C G G C A A T C A G T G A C G G C C C C G C

A

A

T

PARP-/- 351 reads 35 day culture period

G C C G C C A A G T C C A A G A A A A A C C C C C A A A T C A C C A A A A T C G A C A A A A T G T C A C A A T T T C A C G A  
T G A G A G A G A G A C C G A G A C G A G G T C A G C G A C T C A C C T A G G A C G G T C A G G G T T G T C C C G G C C  
C C A A A T G C A G C A C C A C T G T T G T C T G T A T T C C C A C A G A A A T A G A C A G C C T C G T C A T C G G C T C G G  
A C C C C A G T G A T G G T T A A T G T G T T T G T G G A G C C G G A T G G G G A A C C G G A G A A T C G T G A A G G G A T G  
T C C G A G G G T C T C T T G T C G T T G T C A T A G A T C A C A G T G A C A G G G G C A C T G C C A G G A G A C T T C T G C  
T G G T A C C A G C C A T A A T A G T A A C T T C C A G C A T A G C T G C C A C C C C G G A G C A G G T G A T C T T G A C G  
C C A C C C C G G A G C A G G T G A T C T T G A C G G T T T C T C C T G G G T T T G C T G A C A C C G A G G C C G G C T G A  
G T C A G C G C T G C C T G C A C C A G G G A A C C T G G A G A G G G A G A G A G A G G G G A G A A A A C G G C A A T C  
A G T G A C G G C C C C G C  
T

hPARE 368 reads 35 day culture period

G C C G C C A A G T C C A A G A A A A A C C C C C A A A T C A C C A A A A T C G A C A A A A T G T C A C A A T T T C A C G A  
A G T G T G T

T G G G G G A A G A A A G A C C G A G A C G A G G T C A G C G A C T C A C C T A G G A C G G T C A G G G T T G T C C C G G C C  
G

C C A A A T G C A G C A C C A C T G T T G T C T G T A T T C C C A C A G A A A T A G A C A G C C T C G T C A T C G G C T C G G  
C G

A T G C

T C A T T C C C A C A G T

C T A

A T G C

T

A C C C C A G T G A T G G T T A A T G T G T T T G T G G A G C C G G A T A G G G A A C C G G A G A A T C G T G A A G G G A T G

C T T G T G G A G C C G G A T G T G G A A C C G G A G A A T C G T G A A G G G A T G

G C

G C T G T G G A G C C G G A T G C G G A A C C G G A G A A T C G T C A A G G G A T G

G C C G T G G A G C C G A A T T T

C C C

T C C G A G G G T C T C T T G T C G T T G T C A T A G A T C A C A G T G A C A G G G G C A C T G C C A G G A G A C T T C T G C  
G C

T T

T T G A G G G T C T C T T G T C G T G G T C A T A G A T C A C A G T G A C A G G G G C A C T G C C A G G A G A C T T C T G C

T C C G A G G G T C T C T T G T C G T T G C T A T A G A T C A G

T G C C T T C T G C

T C G A G G G T C T G T T G G T G T T G T C A T A G A T C A C A G T G A C A G G G G C A C T G C C A G G T G C C T T C T G C

T

T G G A A C C A G C C A T A A T A A T A A C T T C C A G C A T A G C T G C C A C C C C G G A G C A G G T G A T C T T G A C G  
A G

G

T G G A A C C A G C C A T A A T A A T A A C T T C C A C

T G G T A C C A G C C A T A A T A G

T G G T A C C A G C C A T A A T A G

G

G

C C A C C C C G G A G C A G G T G A T C T T G A C G C C A C C C C G G A G C A G G T G A T C T T G A C G G T T T C T C C T

C C T C C C

G G G T T T G C T G A C A C C G A G G C C G G C T G C T G A G T C A G C G C T G C C T G C A C C A G G G A A C C T G G A G A G  
A G

A

A

G G A G A G G A G A G A G G G G A G A A A C G G C A A T C A G T G A C G G C C C C G C  
A A
